# Supplementary material for: Analysis of alternative bioenergy with carbon capture strategies: present and future
Source: Royal Society of Chemistry journal article supplement (doi:10.1039/d2ee00625a), 2022-01-01
Supplement: d2ee00625a1.pdf [file d2ee00625a1.pdf]

# Economic and Environmental Optimization and Analysis of Biomass to Fuels: Present and Future

Caleb H. Geissler<sup>a, b</sup>, Christos T. Maravelias<sup>a, b, c, \*</sup>

<sup>a</sup> Department of Chemical and Biological Engineering, Princeton University,  
Princeton, NJ 08544

<sup>b</sup> DOE Great Lakes Bioenergy Research Center

<sup>c</sup> Andlinger Center for Energy and the Environment, Princeton University, Princeton,  
NJ 08544

## S1. Mathematical Formulation

### S1.1 Notation

Indexes are given as lower-case italicized roman characters, sets and subsets as capital bold roman characters, parameters as italicized Greek characters, and variables as capital italicized roman characters.

#### Sets

|                    |                        |
|--------------------|------------------------|
| $b \in \mathbf{B}$ | Biomass feedstocks     |
| $c \in \mathbf{C}$ | Carbon capture options |
| $e \in \mathbf{E}$ | Energy purchase        |
| $f \in \mathbf{F}$ | Fuel types             |
| $s \in \mathbf{S}$ | Scaling exponents      |
| $t \in \mathbf{T}$ | Technology             |
| $y \in \mathbf{Y}$ | Years                  |

#### Subsets

|                        |                                                                                                   |
|------------------------|---------------------------------------------------------------------------------------------------|
| $B_t^T$                | Feedstock $b$ used in technology $t$                                                              |
| $\mathbf{C}_{t,e,f}^S$ | Carbon capture options for the combination of technology $t$ , energy purchase $e$ , and fuel $f$ |
| $\mathbf{F}^L$         | Liquid fuels                                                                                      |
| $\mathbf{Y}^C$         | Construction years                                                                                |
| $\mathbf{Y}^S$         | Startup years                                                                                     |
| $\mathbf{Y}^O$         | Operating years                                                                                   |
| $\mathbf{Y}^{OF}$      | First operating year                                                                              |
| $\mathbf{Y}^{OL}$      | Last operating year                                                                               |

#### Parameters

|                            |                                                                                                                                                                                                   |
|----------------------------|---------------------------------------------------------------------------------------------------------------------------------------------------------------------------------------------------|
| $\gamma_{t,e,f,c,s}^{GEN}$ | General plant capital cost corresponding to scaling exponent $s$ for technology $t$ , energy purchase $e$ , fuel $f$ , and carbon capture $c \in \mathbf{C}_{t,e,f}^S$ at reference capacity (\$) |
| $\gamma_{t,e,f,c,s}^{ST}$  | Steam plant capital cost corresponding to scaling exponent $s$ for technology $t$ , energy purchase $e$ , fuel $f$ , and carbon capture $c \in \mathbf{C}_{t,e,f}^S$ at reference capacity (\$)   |
| $\delta^{DIS}$             | Discount rate                                                                                                                                                                                     |

|                          |                                                                                                                                                                                                             |
|--------------------------|-------------------------------------------------------------------------------------------------------------------------------------------------------------------------------------------------------------|
| $\delta_y^{GEN}$         | Depreciation rate for general plant in year $y \in \mathbf{Y}^0$                                                                                                                                            |
| $\delta_y^{ST}$          | Depreciation rate for steam plant in year $y \in \mathbf{Y}^0$                                                                                                                                              |
| $\epsilon_y^C$           | Percent of construction costs incurred in year $y \in \mathbf{Y}^C$                                                                                                                                         |
| $\epsilon_{t,f}^{CG}$    | Cost growth parameter of technology $t$ and fuel $f \in \mathbf{F}^L$                                                                                                                                       |
| $\epsilon_{t,f,y}^{PER}$ | Plant performance of technology $t$ and fuel $f \in \mathbf{F}^L$ in year $y \in \mathbf{Y}^0$                                                                                                              |
| $\epsilon_y^{SF}$        | Percent of fixed costs incurred during startup in year $y \in \mathbf{Y}^S$                                                                                                                                 |
| $\epsilon_y^{SP}$        | Percent of production during startup in year $y \in \mathbf{Y}^S$                                                                                                                                           |
| $\epsilon_y^{ST}$        | Percent of year $y \in \mathbf{Y}^0$ spent in startup                                                                                                                                                       |
| $\epsilon_y^{SV}$        | Percent of variable costs incurred during startup in year $y \in \mathbf{Y}^S$                                                                                                                              |
| $\zeta^{REF}$            | Reference capacity (Mg feedstock/day)                                                                                                                                                                       |
| $\zeta$                  | Capacity (Mg feedstock/day)                                                                                                                                                                                 |
| $\eta_{t,e,c}^E$         | Amount of electricity in excess for technology $t$ , energy purchase $e$ , liquid fuel production, and carbon capture $c \in \mathbf{C}_{t,e,f}^S$ (MWh/Mg feedstock)                                       |
| $\eta_{t,e,f,c}^F$       | Fuel production for technology $t$ , energy purchase $e$ , fuel $f$ , and carbon capture $c \in \mathbf{C}_{t,e,f}^S$ (GGE/Mg feedstock)                                                                    |
| $\kappa_b^{FD}$          | Cost of feedstock $b$ (\$/Mg)                                                                                                                                                                               |
| $\kappa_{t,e,f,c}^{FX}$  | Fixed cost for technology $t$ , energy purchase $e$ , fuel $f$ , and carbon capture $c \in \mathbf{C}_{t,e,f}^S$ (\$/yr)                                                                                    |
| $\kappa_{t,e,f,c}^M$     | Material cost for technology $t$ , energy purchase $e$ , fuel $f$ , and carbon capture $c \in \mathbf{C}_{t,e,f}^S$ (\$/Mg feedstock)                                                                       |
| $\kappa_{t,e,f,c}^O$     | Operating cost for technology $t$ , energy purchase $e$ , fuel $f$ , and carbon capture $c \in \mathbf{C}_{t,e,f}^S$ (\$/Mg feedstock)                                                                      |
| $\mu^L$                  | Upper bound of yearly losses (\$/yr)                                                                                                                                                                        |
| $\mu^T$                  | Upper bound for taxes paid (\$/yr)                                                                                                                                                                          |
| $\nu^O$                  | Overhead rate                                                                                                                                                                                               |
| $\nu^{WC}$               | Working capital percent                                                                                                                                                                                     |
| $\pi^E$                  | Purchase/sell price of electricity (\$/MWh)                                                                                                                                                                 |
| $\pi^{SEQ}$              | Sequestration credit (\$/Mg CO <sub>2</sub> )                                                                                                                                                               |
| $\pi^{TR}$               | Transportation and injection cost of CO <sub>2</sub> (\$/Mg CO <sub>2</sub> )                                                                                                                               |
| $\sigma_s$               | Value of scaling exponent                                                                                                                                                                                   |
| $\tau$                   | Tax rate                                                                                                                                                                                                    |
| $\chi_f^E$               | Efficiency of fuel $f$ in an engine                                                                                                                                                                         |
| $\psi_{t,e,f,c}^{CCS}$   | CO <sub>2</sub> sequestered for technology $t$ , energy purchase $e$ , fuel $f$ , and carbon capture $c \in \mathbf{C}_{t,e,f}^S$ (Mg CO <sub>2</sub> e/Mg feedstock)                                       |
| $\psi_{t,e,f,c}^{CHE}$   | CO <sub>2</sub> e emissions from biorefinery chemical consumption for technology $t$ , energy purchase $e$ , fuel $f$ , and carbon capture $c \in \mathbf{C}_{t,e,f}^S$ (Mg CO <sub>2</sub> e/Mg feedstock) |
| $\psi_e^{EP}$            | Incurred CO <sub>2</sub> e emissions from energy purchased (Mg CO <sub>2</sub> e/MWh)                                                                                                                       |
| $\psi_f^F$               | Mitigated CO <sub>2</sub> e emissions from fuel sold (Mg CO <sub>2</sub> e/GGE)                                                                                                                             |
| $\psi_b^H$               | CO <sub>2</sub> emissions from harvesting biomass $b$ (Mg CO <sub>2</sub> e/Mg feedstock)                                                                                                                   |
| $\psi_b^{SOC}$           | CO <sub>2</sub> sequestered in soil organic carbon by biomass $b$ (Mg CO <sub>2</sub> e/Mg feedstock)                                                                                                       |
| $\psi_b^{TR}$            | CO <sub>2</sub> emissions from transport of biomass $b$ (Mg CO <sub>2</sub> e/Mg feedstock)                                                                                                                 |
| $\omega^{OP}$            | Operating days per year                                                                                                                                                                                     |

## Variables

### Real variables

|              |                                                                                |
|--------------|--------------------------------------------------------------------------------|
| $INC_y^{AN}$ | Annual income in year $y$ (\$/yr)                                              |
| $INC_y^{TX}$ | Taxable income in year $y$ (\$/yr)                                             |
| $MFSP$       | Minimum fuel selling price (\$/GGE)                                            |
| $MFSP^F$     | Minimum fuel selling price normalized to forward motion (\$/GJ forward motion) |
| $REV_y$      | Revenue in year $y$ (\$/yr)                                                    |

### Non-negative continuous variables

|             |                                                                                                                |
|-------------|----------------------------------------------------------------------------------------------------------------|
| $ACI_y$     | Annual cash inflow (\$/yr)                                                                                     |
| $C_y^{OP}$  | Operating cost in year $y$ (\$/yr)                                                                             |
| $C_y^{FX}$  | Fixed cost in year $y$ (\$/yr)                                                                                 |
| $C_y^{TR}$  | Cost of transporting CO <sub>2</sub> in year $y$ (\$/yr)                                                       |
| $C_y^{SEQ}$ | Credit from sequestration of CO <sub>2</sub> in year $y$ (\$/yr)                                               |
| $FCI$       | Fixed capital investment (\$)                                                                                  |
| $FCI^{GEN}$ | Fixed capital investment for general plant (\$)                                                                |
| $FCI^{ST}$  | Fixed capital investment for steam plant (\$)                                                                  |
| $GHG^D$     | Direct GHG sequestration (Mg CO <sub>2</sub> /Mg feedstock)                                                    |
| $GHG^{NET}$ | GHG sequestration balance with direct sequestration and mitigated emissions (Mg CO <sub>2</sub> /Mg feedstock) |
| $L_y$       | Losses in year $y$ (\$/yr)                                                                                     |
| $L_y^D$     | Dummy variable for losses in year $y$ (\$/yr)                                                                  |
| $T_y$       | Taxes paid in year $y$ (\$/yr)                                                                                 |
| $T_y^D$     | Dummy variable for taxes in year $y$ (\$/yr)                                                                   |
| $TCI$       | Total capital investment (\$)                                                                                  |

### Binary variables

|                 |                                                                                                        |
|-----------------|--------------------------------------------------------------------------------------------------------|
| $Z_{t,e,f,c}^S$ | =1 if strategy (technology $t$ , energy purchase $e$ , fuel $f$ , and carbon capture $c$ ) is selected |
| $Y_y^L$         | =1 if there are net losses in year $y$                                                                 |
| $Y_y^T$         | =1 if there are taxes paid in year $y$                                                                 |

## S1.2 Mathematical Model

The mathematical model is presented below. For comparisons between liquid fuels, we minimize  $MFSP$ , and for comparisons of all fuel types, we minimize the breakeven price normalized to forward motion,  $MFSP^F$ .

$$FCI^{GEN} = (1 + \nu^O) \sum_{t,e,f,s,c \in \mathcal{C}_{t,e,f}^S} Z_{t,e,f,c}^S \gamma_{t,e,f,c,s}^{GEN} \left( \frac{\zeta}{\zeta_{REF}} \right)^{\sigma_s} \quad (S1.1)$$

$$FCI^{ST} = (1 + \nu^O) \sum_{t,e,f,s,c \in \mathcal{C}_{t,e,f}^S} Z_{t,e,f,c}^S \gamma_{t,e,f,c,s}^{ST} \left( \frac{\zeta}{\zeta_{REF}} \right)^{\sigma_s} \quad (S1.2)$$

$$\sum_{t,e,f,c \in \mathcal{C}_{t,e,f}^S} Z_{t,e,f,c}^S = 1 \quad (S1.3)$$

$$FCI = FCI^{GEN} + FCI^{ST} \quad (S1.4)$$

$$TCI = FCI(1 + \nu^{WC}) \quad (S1.5)$$

$$INC_y^{AN} = (\epsilon_y^{ST} \epsilon_y^{SP} + 1 - \epsilon_y^{ST}) \sum_{t,e,f,c \in \mathcal{C}_{t,e,f}^S} Z_{t,e,f,c}^S \omega^{OP} \zeta(\eta_{t,e,f,c}^F MFSP + \eta_{t,e,c}^E \pi^E) \quad y \in \mathbf{Y}^0 \quad (S1.6)$$

$$C_y^{OP} = (\epsilon_y^{ST} \epsilon_y^{SV} + 1 - \epsilon_y^{ST}) \sum_{t,e,f,c \in \mathcal{C}_{t,e,f}^S, b \in B_t^I} Z_{t,e,f,c}^S \omega^{OP} \zeta(\kappa_{t,e,f,c}^M + \kappa_{t,e,f,c}^O + \kappa_b^{FD}) \quad y \in \mathbf{Y}^0 \quad (S1.7)$$

$$C_y^{TR} = (\epsilon_y^{ST} \epsilon_y^{SP} + 1 - \epsilon_y^{ST}) \sum_{t,e,f,c \in \mathcal{C}_{t,e,f}^S} Z_{t,e,f,c}^S \omega^{OP} \zeta \psi_{t,e,f,c}^{CCS} \pi^{TR} \quad y \in \mathbf{Y}^0 \quad (S1.8)$$

$$C_y^{FX} = (\epsilon_y^{ST} \epsilon_y^{SF} + 1 - \epsilon_y^{ST}) \sum_{t,e,f,c \in \mathcal{C}_{t,e,f}^S} Z_{t,e,f,c}^S \kappa_{t,e,f,c}^{FX} \quad y \in \mathbf{Y}^0 \quad (S1.9)$$

$$C_y^{SEQ} = (\epsilon_y^{ST} \epsilon_y^{SP} + 1 - \epsilon_y^{ST}) \sum_{t,e,f,c \in \mathcal{C}_{t,e,f}^S} Z_{t,e,f,c}^S \omega^{OP} \zeta \psi_{t,e,f,c}^{CCS} \pi^{SEQ} \quad y \in \mathbf{Y}^0 \quad (S1.10)$$

$$REV_y = INC_y^{AN} + C_y^{SEQ} - (C_y^{OP} + C_y^{TR} + C_y^{FX} + \delta_y^{GEN} FCI^{GEN} + \delta_y^{ST} FCI^{ST}) \quad y \in \mathbf{Y}^0 \quad (S1.11)$$

$$L_y^D - L_y = INC_{y-1}^{TX} + C_y^{SEQ} \quad y \in \mathbf{Y}^0 \setminus \mathbf{Y}^{OF} \quad (S1.12)$$

$$L_y \leq Y_y^L \mu^L \quad y \in \mathbf{Y}^0 \setminus \mathbf{Y}^{OF} \quad (S1.13)$$

$$L_y^D \leq (1 - Y_y^L) \mu^L \quad y \in \mathbf{Y}^0 \setminus \mathbf{Y}^{OF} \quad (S1.14)$$

$$INC_y^{TX} = \begin{cases} REV_y & y \in \mathbf{Y}^{OF} \\ REV_y - L_y & y \in \mathbf{Y}^0 \setminus \mathbf{Y}^{OF} \end{cases} \quad (S1.15)$$

$$T_y - T_y^D = \tau INC_y^{TX} \quad y \in \mathbf{Y}^0 \quad (S1.16)$$

$$T_y \leq Y_y^T \mu^T \quad y \in \mathbf{Y}^0 \quad (S1.17)$$

$$T_y^D \leq (1 - Y_y^T) \mu^T \quad y \in \mathbf{Y}^0 \quad (S1.18)$$

$$ACI_y = INC_y^{AN} + C_y^{SEQ} - (C_y^{OP} + C_y^{TR} + C_y^{FX} + T_y) \quad (S1.19)$$

$$\sum_{y \in \mathbf{Y}^C} \epsilon_y^C (1 + \delta^{DIS})^{-y} FCI + \epsilon^{WC} FCI \left( 1 - \sum_{y \in \mathbf{Y}^{OL}} (1 + \delta^{DIS})^{-y} \right) = \sum_{y \in \mathbf{Y}^0} ACI_y (1 + \delta^{DIS})^{-y} \quad (S1.20)$$

$$MFSP^F \sum_{t,e,f,c \in \mathcal{C}_{t,e,f}^S} Z_{t,e,f,c}^S \chi_f = MFSP \left( 8.32 \frac{GGE}{GJ} \right) \quad (S1.21)$$

$$GHG^D = \sum_{t,e,f,c \in \mathcal{C}_{t,e,f}^S, b \in B_t^I} Z_{t,e,f,c}^S (\psi_b^{SOC} - \psi_b^H - \psi_b^{TR} + \psi_{t,e,f,c}^{CCS}) \quad (S1.22)$$

$$GHG^{NET} = GHG^D - \sum_{t,e,f \in \mathbf{F}^L, c \in \mathcal{C}_{t,e,f}^S} Z_{t,e,f,c}^S \eta_{t,e,c}^E \psi_e^{EP} + \sum_{t,e,f,c \in \mathcal{C}_{t,e,f}^S} Z_{t,e,f,c}^S (\eta_{t,e,f,c}^F \psi_f^F - \psi_{t,e,f,c}^{CHE}) \quad (S1.23)$$

## S2. Feedstock and transportation data

**Table S2.1.** Biomass growth data.

| Parameter                  | Units                                  | Value             |                   |
|----------------------------|----------------------------------------|-------------------|-------------------|
|                            |                                        | Switchgrass       | Poplar            |
| Yield                      | Mg/h/yr                                | 7.3 <sup>1</sup>  | 9.2 <sup>1</sup>  |
| Percent of Land Available  | %                                      | 1.4 <sup>2</sup>  | 1.4 <sup>1</sup>  |
| Farm Price                 | \$/Mg                                  | 44.9 <sup>3</sup> | 58.7 <sup>4</sup> |
| Fuel Emissions             | g CO <sub>2</sub> e/m <sup>2</sup> /yr | 4.6 <sup>1</sup>  | 0.6 <sup>1</sup>  |
| Fertilizer Emissions       | g CO <sub>2</sub> e/m <sup>2</sup> /yr | 33.8 <sup>1</sup> | - <sup>1</sup>    |
| N <sub>2</sub> O Emissions | g CO <sub>2</sub> e/m <sup>2</sup> /yr | 56.9 <sup>1</sup> | 27.1 <sup>1</sup> |
| CH <sub>4</sub> Oxidation  | g CO <sub>2</sub> e/m <sup>2</sup> /yr | -0.9 <sup>1</sup> | -1.2 <sup>1</sup> |
| SOC Sequestration          | g CO <sub>2</sub> e/m <sup>2</sup> /yr | -115 <sup>1</sup> | -115              |

For transportation, we use the model developed by Ng *et al.*<sup>5</sup>

**Table S2.2.** Biomass transportation data.<sup>5</sup>

| Parameter                         | Units    | Value       |        |
|-----------------------------------|----------|-------------|--------|
|                                   |          | Switchgrass | Poplar |
| Biomass Handling Cost             | \$/Mg    | 19.3        | *      |
| Depot Cost                        | \$/Mg    | 19.7        | 18.2   |
| Truck Fixed Cost                  | \$/Mg    | 7.5         | 4.7    |
| Truck-Depot-Truck Fixed Cost      | \$/Mg    | 11.1        | 10.9   |
| Truck-Depot-Rail Fixed Cost       | \$/Mg    | 26.7        | 27     |
| Truck Variable Cost               | \$/Mg/km | 0.218       | 0.142  |
| Truck-Depot-Truck Variable Cost   | \$/Mg/km | 0.07        | 0.098  |
| Truck-Depot-Rail Variable Cost    | \$/Mg/km | 0.012       | 0.022  |
| Biomass Handling Energy           | MJ/Mg    | 681         | 681    |
| Depot Energy                      | MJ/Mg    | 882         | 882    |
| Truck Variable Energy             | MJ/Mg/km | 5.27        | 3.43   |
| Truck-Depot-Truck Variable Energy | MJ/Mg/km | 1.13        | 1.11   |
| Truck-Depot-Rail Variable Energy  | MJ/Mg/km | 0.177       | 0.18   |

\*included in farm price of poplar

### S3. Economic assumptions

Additional costs beyond installed capital costs are assumed as described in Table S3.1.

**Table S3.1.** Additional indirect costs.

| Item                                           | Parameter in model | Amount                          |
|------------------------------------------------|--------------------|---------------------------------|
| Warehouse, site development, additional piping | $v^O$              | 10% of total direct costs       |
| Prorateable costs                              |                    | 10% of total direct costs       |
| Field expenses                                 |                    | 10% of total direct costs       |
| Home office and construction                   |                    | 20% of total direct costs       |
| Project contingency                            |                    | 10% of total direct costs       |
| Working capital                                | $v^{WC}$           | 15% of fixed capital investment |

Fixed capital investment is calculated as the sum of installed costs and indirect costs. Total capital investment is calculated as the sum of fixed capital investment and working capital. The project is assumed to be 100% equity financed. Discounted cash flow analysis parameters and scaling exponents are given in Tables S3.2 and S3.3, respectively.

**Table S3.2.** Discounted cash flow analysis parameters.<sup>6</sup>

| Item                                   | Set/Parameter in model | Value                  |
|----------------------------------------|------------------------|------------------------|
| Plant life                             | $ Y^O $                | 30 years               |
| Discount rate                          | $\delta^{DIS}$         | 10%                    |
| Income tax rate                        | $\tau$                 | 35%                    |
| General plant depreciation             | $\delta_y^{GEN}$       | 200% declining balance |
| General plant recovery period          |                        | 7 years                |
| Steam plant depreciation               | $\delta_y^{ST}$        | 150% declining balance |
| Steam plant recovery period            |                        | 20 years               |
| Construction period                    | $ Y^C $                | 3 years                |
| First year's expenditures              | $\epsilon_{y-2}^C$     | 8%                     |
| Second year's expenditures             | $\epsilon_{y-1}^C$     | 60%                    |
| Third year's expenditures              | $\epsilon_{y_0}^C$     | 32%                    |
| Startup time                           | $\epsilon_{y_1}^{ST}$  | 0.5 years              |
| Revenues during startup                | $\epsilon_{y_1}^{SP}$  | 50%                    |
| Variable costs incurred during startup | $\epsilon_{y_1}^{SV}$  | 75%                    |
| Fixed costs incurred during startup    | $\epsilon_{y_1}^{SF}$  | 100%                   |

**Table S3.3.** Scaling exponents

| $s \in \mathbf{S}$ | $s_1$ | $s_2$ | $s_3$ | $s_4$ | $s_5$ | $s_6$ | $s_7$ | $s_8$ | $s_9$ |
|--------------------|-------|-------|-------|-------|-------|-------|-------|-------|-------|
| $\sigma_s$         | 1     | 0.9   | 0.8   | 0.75  | 0.72  | 0.7   | 0.65  | 0.6   | 0.5   |

We assume an electricity purchase/sell price ( $\pi^E$ ) of \$60/MWh. The cost of transporting and injecting CO<sub>2</sub> into saline aquifers ( $\pi^{TR}$ ) is \$12/Mg CO<sub>2</sub>.

## S4. Pioneer Plant Analysis

For calculating the additional costs and reduced performance of a pioneer plant, we use the methodology developed by the RAND Corporation.<sup>7</sup> In this method, the total capital investment and plant performance of the pioneer plant are calculated according to Eqs. (S4.1 and (S4.2, respectively.

$$TCI_{pioneer} = \frac{TCI_{nth}}{CG} \quad (S4.1)$$

$$Cost_{pioneer,y} = \max(PER + 20(y - 1), 100) Cost_{nth,y} \quad (S4.2)$$

$CG$  is the cost growth and  $PER$  is the fraction of peak performance in the first year of operation.  $CG$  and  $PER$  are determined by Eqs. (S4.3 and (S4.4, respectively.

$$CG = 1.12196 - 0.00297 \times PNEW - 0.02125 \times IMP - 0.01137 \times COMP + 0.00111 \times INCL - 0.06351 \times PDEF \quad (S4.3)$$

$$PER = 85.77 - 9.69 \times NSTEP + 0.33 \times BALQ - 4.12 \times WST - 17.91 \times SLDS \quad (S4.4)$$

The descriptions of the parameters in Eqs. (S4.3 and (S4.4 are given in Table S4.1.

**Table S4.1.** Pioneer plant analysis parameters.

| Parameter | Full Name: Description                                                                                                                              | Range    | Value        |           |              |
|-----------|-----------------------------------------------------------------------------------------------------------------------------------------------------|----------|--------------|-----------|--------------|
|           |                                                                                                                                                     |          | Fermentation | Pyrolysis | Gasification |
| PNEW      | Percent new: percentage of equipment cost data for new equipment                                                                                    | 0-100    | 30           | 40        | 30           |
| IMP       | Impurities: a factor of impurities present in the process                                                                                           | 0-5      | 3            | 4         | 4            |
| COMP      | Complexities: number of consecutively linked plant areas                                                                                            | $\geq 1$ | 6            | 5         | 9            |
| INCL      | Inclusiveness: percent of land purchase/lease, initial plant inventory/parts/ catalysts, and pre-operating personnel costs included in the analysis | 0-100    | 0            | 0         | 33           |
| PDEF      | Project definition: a factor of level of detail in the analysis                                                                                     | 2-8      | 4            | 8         | 7            |
| NSTEP     | New steps: number of new process areas                                                                                                              | $\geq 0$ | 3            | 3         | 2            |
| BALQ      | Balance equations: percentage of mass and energy balance equations based on commercial plant data                                                   | 0-100    | 60           | 0         | 0            |
| WST       | Waste: a factor of waste disposal                                                                                                                   | 0-5      | 2            | 4         | 4            |
| SLDS      | Solids: a factor based on the presence of solids                                                                                                    | 0 or 1   | 1            | 1         | 1            |
|           | $\epsilon_{t,f}^{CG}$                                                                                                                               |          | 0.65         | 0.35      | 0.44         |
|           | $\epsilon_{t,f,y_1}^{PER}$                                                                                                                          |          | 60%          | 22%       | 32%          |
|           | References                                                                                                                                          |          | 8,9          | 10,11     | 12,13        |

For the pioneer plant analysis, model equations S1.1-2 and S1.6-10 are replaced with equations S4.5-11, and only liquid fuels ( $f \in \mathbf{F}^L$ ) are considered.

$$FCI^{GEN} = (1 + \epsilon^0) \sum_{t,e,f,s,c \in \mathcal{C}_{t,e,f}^S} \frac{Z_{t,e,f,c}^S \gamma_{t,e,f,c,s}^{GEN}}{\epsilon_{t,f}^{CG}} \left( \frac{\zeta}{\zeta^{REF}} \right)^{\sigma_s} \quad y \in \mathbf{Y}^0 \quad (S4.5)$$

$$FCI^{ST} = (1 + \epsilon^0) \sum_{t,e,f,s,c \in \mathcal{C}_{t,e,f}^S} \frac{Z_{t,e,f,c}^S \gamma_{t,e,f,c,s}^{ST}}{\epsilon_{t,f}^{CG}} \left( \frac{\zeta}{\zeta^{REF}} \right)^{\sigma_s} \quad y \in \mathbf{Y}^0 \quad (S4.6)$$

$$INC_y^{AN} = (\epsilon_y^{ST} \epsilon_y^{SP} + 1 - \epsilon_y^{ST}) \sum_{t,e,f,c \in \mathcal{C}_{t,e,f}^S} \frac{Z_{t,e,f,c}^S \omega^{OP} \zeta (\eta_{t,e,f,c}^F MFSP + \eta_{t,e,c}^E \pi^E)}{\epsilon_{t,f,y}^{PER}} \quad y \in \mathbf{Y}^0 \quad (S4.7)$$

$$C_y^{OP} = (\epsilon_y^{ST} \epsilon_y^{SV} + 1 - \epsilon_y^{ST}) \sum_{t,e,f,c \in \mathcal{C}_{t,e,f}^S, b \in B_t^T} \frac{Z_{t,e,f,c}^S \omega^{OP} \zeta (\kappa_{t,e,f,c}^M + \kappa_{t,e,f,c}^O + \kappa_b^{FD})}{\epsilon_{t,f,y}^{PER}} \quad y \in \mathbf{Y}^0 \quad (S4.8)$$

$$C_y^{TR} = (\epsilon_y^{ST} \epsilon_y^{SP} + 1 - \epsilon_y^{ST}) \sum_{t,e,f,c \in \mathcal{C}_{t,e,f}^S} \frac{Z_{t,e,f,c}^S \omega^{OP} \zeta \psi_{t,e,f,c}^{CCS} \pi^{TR}}{\epsilon_{t,f,y}^{PER}} \quad y \in \mathbf{Y}^0 \quad (S4.9)$$

$$C_y^{FX} = (\epsilon_y^{ST} \epsilon_y^{SF} + 1 - \epsilon_y^{ST}) \sum_{t,e,f,c \in \mathcal{C}_{t,e,f}^S} \frac{Z_{t,e,f,c}^S \kappa_{t,e,f,c}^{FX}}{\epsilon_{t,f,y}^{PER}} \quad y \in \mathbf{Y}^0 \quad (S4.10)$$

$$C_y^{SEQ} = (\epsilon_y^{ST} \epsilon_y^{SP} + 1 - \epsilon_y^{ST}) \sum_{t,e,f,c \in \mathcal{C}_{t,e,f}^S} \frac{Z_{t,e,f,c}^S \omega^{OP} \zeta \psi_{t,e,f,c}^{CCS} \pi^{SEQ}}{\epsilon_{t,f,y}^{PER}} \quad y \in \mathbf{Y}^0 \quad (S4.11)$$



## S5. Strategy parameters and illustration

A conceptual illustration of how we define a strategy is shown in Figure S5.1. A strategy is defined by the technology  $t \in \mathbf{T}$ , energy  $e \in \mathbf{E}$  purchased, fuel  $f \in \mathbf{F}$  produced, and carbon capture  $c \in \mathbf{C}$ .

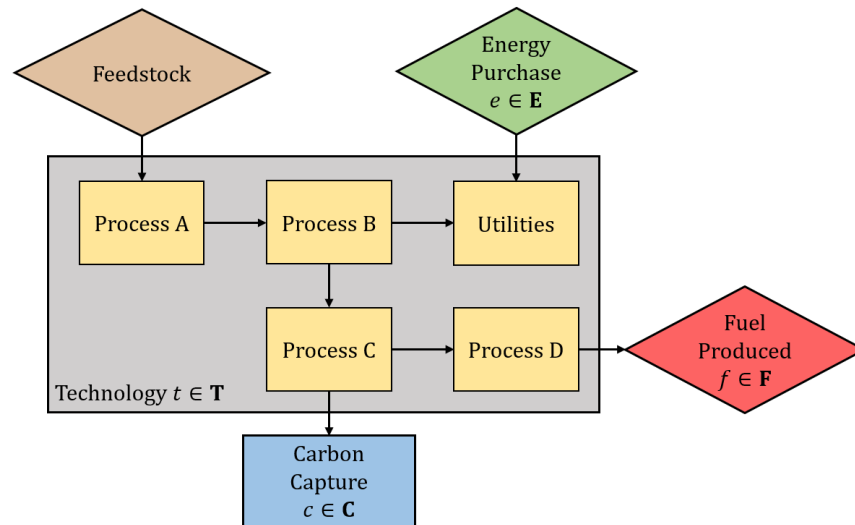

**Figure S5.1.** Illustration of an example strategy,

Parameters for each strategy, and the references from which data is taken, are provided in Tables S5.1-3.

**Table S5.1.** Process costs and parameters for fermentation to ethanol.

| Technology $t \in \mathbf{T}$       |                                   | <i>Fer</i> | <i>Fer</i> | <i>Fer</i>    | <i>Fer</i>       | <i>Fer</i>       |
|-------------------------------------|-----------------------------------|------------|------------|---------------|------------------|------------------|
| Energy Purchased $e \in \mathbf{E}$ |                                   | -          | -          | -             | -                | <i>Elec</i>      |
| Fuel $f \in \mathbf{F}$             |                                   | <i>Liq</i> | <i>Liq</i> | <i>Liq</i>    | <i>Liq</i>       | <i>Liq</i>       |
| Carbon Capture $c \in \mathbf{C}$   |                                   | -          | <i>Fer</i> | <i>FerBio</i> | <i>FerBioFlu</i> | <i>FerBioFlu</i> |
| $\gamma_{t,e,f,c,s}^{GEN}$          | $s_1$ MM\$                        | 65.3       | 65.3       | 65.3          | 65.3             | 65.3             |
|                                     | $s_3$ MM\$                        | 13.6       | 28.8       | 47.0          | 63.1             | 117.6            |
|                                     | $s_6$ MM\$                        | 91.3       | 91.3       | 91.3          | 91.3             | 91.3             |
|                                     | $s_8$ MM\$                        | 30.1       | 30.1       | 30.1          | 30.1             | 30.1             |
|                                     | $s_9$ MM\$                        | 0.7        | 0.7        | 0.7           | 0.7              | 0.7              |
| $\gamma_{t,e,f,c,s}^{ST}$           | $s_4$ MM\$                        | 19.1       | 19.1       | 18.4          | 15.8             | 9.9              |
|                                     | $s_6$ MM\$                        | 57.6       | 57.6       | 57.6          | 57.6             | 57.6             |
|                                     | $s_7$ MM\$                        | 1.0        | 1.0        | 1.0           | 1.0              | 1.0              |
|                                     | $s_8$ MM\$                        | 0.2        | 0.2        | 0.2           | 0.2              | 0.2              |
| $\kappa_{t,e,f,c}^{FX}$             | MM\$/yr                           | 12.6       | 12.6       | 12.6          | 12.6             | 12.6             |
| $\kappa_{t,e,f,c}^M$                | \$/Mg feedstock                   | 34.9       | 36.7       | 37.3          | 38.0             | 39.4             |
| $\kappa_{t,e,f,c}^O$                | \$/Mg feedstock                   | 2.0        | 2.0        | 2.0           | 2.0              | 2.0              |
| $\eta_{t,e,c}^E$                    | MWh/Mg feedstock                  | 0.188      | 0.152      | 0.107         | -                | -0.226           |
| $\eta_{t,e,f,c}^F$                  | GGE/Mg feedstock                  | 62.3       | 62.3       | 62.3          | 62.3             | 62.3             |
| $\psi_{t,e,f,c}^{CCS}$              | Mg CO <sub>2</sub> /Mg feedstock  | -          | 0.47       | 0.65          | 0.80             | 1.12             |
| $\psi_{t,e,f,c}^{CHE}$              | Mg CO <sub>2e</sub> /Mg feedstock | 0.142      | 0.142      | 0.142         | 0.142            | 0.142            |
| References                          |                                   | 6          | 6,14       | 6,14          | 6,14             | 6,14             |

\**Bio*: Biogas, *Elec*: Electricity, *Fer*: Fermentation, *Flu*: Flue gas, *Liq*: Liquid fuel

**Table S5.2.** Process costs and parameters for gasoline/diesel production.

| Technology $t \in \mathbf{T}$                            | <i>Pyr</i> | <i>Pyr</i> | <i>Pyr</i>   | <i>Pyr</i> | <i>Pyr</i> | <i>Gas</i> | <i>Gas</i>  | <i>Gas</i>    | <i>Gas</i> | <i>Gas</i>    |
|----------------------------------------------------------|------------|------------|--------------|------------|------------|------------|-------------|---------------|------------|---------------|
| Energy Purchased $e \in \mathbf{E}$                      | <i>H2</i>  | <i>H2</i>  | <i>H2Ele</i> | -          | -          | -          | <i>Elec</i> | <i>Elec</i>   | -          | -             |
| Fuel $f \in \mathbf{F}$                                  | <i>Liq</i> | <i>Liq</i> | <i>Liq</i>   | <i>Liq</i> | <i>Liq</i> | <i>Liq</i> | <i>Liq</i>  | <i>Liq</i>    | <i>Liq</i> | <i>Liq</i>    |
| Carbon Capture $c \in \mathbf{C}$                        | -          | <i>Flu</i> | <i>Flu</i>   | -          | <i>Flu</i> | -          | <i>Syn</i>  | <i>SynFlu</i> | <i>Syn</i> | <i>SynFlu</i> |
| $\gamma_{t,e,f,c}^{GEN}$ $s_1$ MM\$                      | 65.8       | 65.8       | 65.8         | 77.9       | 77.9       | 2.5        | 2.5         | 2.5           | 2.5        | 1.8           |
| $s_2$ MM\$                                               | 0.2        | 0.2        | 0.2          | 8.7        | 8.7        | 0.2        | 0.2         | 0.2           | 0.2        | 0.2           |
| $s_3$ MM\$                                               | 4.4        | 59.5       | 70.1         | 5.0        | 5.0        | 3.5        | 12.4        | 60.9          | 14.2       | 66.5          |
| $s_4$ MM\$                                               | 26.6       | 21.9       | 20.4         | 26.6       | 26.6       | -          | -           | -             | -          | -             |
| $s_6$ MM\$                                               | 130.6      | 130.6      | 130.6        | 140.3      | 140.3      | 103.5      | 103.5       | 101.9         | 103.5      | 101.9         |
| $s_7$ MM\$                                               | 0.2        | 0.2        | 0.2          | 0.2        | 0.2        | -          | -           | -             | -          | -             |
| $s_8$ MM\$                                               | -          | -          | -            | -          | -          | 68.9       | 68.9        | 68.9          | 68.9       | 68.9          |
| $s_9$ MM\$                                               | 66.7       | 66.7       | 66.7         | 67.3       | 67.3       | 2.1        | 2.1         | 2.1           | 2.1        | 2.1           |
| $\gamma_{t,e,f,c}^{ST}$ $s_1$ MM\$                       | -          | -          | -            | -          | -          | 3.3        | 3.3         | 3.3           | 3.2        | 2.4           |
| $s_3$ MM\$                                               | -          | -          | -            | -          | -          | 1.4        | 1.4         | 1.4           | 1.8        | 5.0           |
| $s_4$ MM\$                                               | -          | -          | -            | -          | -          | 36.1       | 36.1        | 20.3          | 37.9       | 53.8          |
| $s_6$ MM\$                                               | -          | -          | -            | -          | -          | 1.2        | 1.2         | 1.2           | 1.2        | 0.9           |
| $s_7$ MM\$                                               | -          | -          | -            | -          | -          | 0.4        | 0.4         | 0.4           | 0.4        | 0.2           |
| $s_9$ MM\$                                               | -          | -          | -            | -          | -          | 1.3        | 1.3         | 1.3           | 1.3        | 1.1           |
| $\kappa_{t,e,f,c}^{FX}$ MM\$/yr                          | 25.8       | 25.8       | 25.8         | 28.4       | 28.4       | 20.3       | 20.3        | 20.3          | 20.3       | 20.3          |
| $\kappa_{t,e,f,c}^M$ \$/Mg feedstock                     | 23.3       | 23.3       | 23.3         | 12.1       | 4.7        | 17.3       | 17.3        | 17.3          | 17.2       | 12.8          |
| $\kappa_{t,e,f,c}^O$ \$/Mg feedstock                     | 2.3        | 5.2        | 5.9          | 2.4        | 23.3       | 1.5        | 3.1         | 4.2           | 3.4        | 13.0          |
| $\eta_{t,e,c}^E$ MWh/Mg feedstock                        | 0.411      | -          | -0.096       | 0.193      | -          | -          | -0.010      | -0.392        | -          | -             |
| $\eta_{t,e,f,c}^F$ GGE/Mg feedstock                      | 67.7       | 67.7       | 67.7         | 67.7       | 26.3       | 56.4       | 56.4        | 56.4          | 55.8       | 40.6          |
| $\psi_{t,e,f,c}^{CCS}$ Mg CO <sub>2</sub> /Mg feedstock  | -          | 0.79       | 0.98         | -          | 1.22       | -          | 0.42        | 1.16          | 0.42       | 1.26          |
| $\psi_{t,e,f,c}^{CHE}$ Mg CO <sub>2</sub> e/Mg feedstock | 0.132      | 0.132      | 0.132        | 0.011      | 0.011      | 0.009      | 0.009       | 0.009         | 0.009      | 0.009         |
| References                                               | 10,11      | 10,11,15   | 10,11,15     | 10,11      | 10,11,15   | 12,13      | 12,13,15    | 12,13,15      | 12,13,15   | 12,13,15      |

\**Elec*: Electricity, *Flu*: Flue gas, *Gas*: Gasification, *Liq*: Liquid fuel, *Pyr*: Pyrolysis, *Syn*: Syngas

**Table S5.3.** Process costs and parameters for nonliquid fuel production.

| Technology $t \in \mathbf{T}$       |                                   | <i>Gas</i> | <i>Gas</i> | <i>Gas</i>    | <i>Gas</i>  | <i>Gas</i>  | <i>Gas</i>    | <i>Comb</i> | <i>Comb</i> |
|-------------------------------------|-----------------------------------|------------|------------|---------------|-------------|-------------|---------------|-------------|-------------|
| Energy Purchased $e \in \mathbf{E}$ |                                   | -          | -          | -             | -           | -           | -             | -           | -           |
| Fuel $f \in \mathbf{F}$             |                                   | <i>H2</i>  | <i>H2</i>  | <i>H2</i>     | <i>Elec</i> | <i>Elec</i> | <i>Elec</i>   | <i>Elec</i> | <i>Elec</i> |
| Carbon Capture $c \in \mathbf{C}$   |                                   | -          | <i>Syn</i> | <i>SynFlu</i> | -           | <i>Syn</i>  | <i>SynFlu</i> | -           | <i>Flu</i>  |
| $s_1$                               | MM\$                              | 11.7       | 11.7       | 11.7          | 11.7        | 11.7        | 11.7          | 11.7        | 11.7        |
| $s_2$                               | MM\$                              | 18.0       | 18.0       | 18.0          | 18.0        | 18.0        | 18.0          | 18.0        | 18.0        |
| $\gamma_{t,e,f,c,s}^{GEN}$          | $s_3$ MM\$                        | 10.4       | 33.5       | 74.7          | 10.4        | 33.5        | 91.0          | -           | 133.3       |
|                                     | $s_6$ MM\$                        | 138.1      | 137.5      | 131.2         | 116.5       | 116.5       | 116.5         | -           | -           |
|                                     | $s_8$ MM\$                        | 4.6        | 4.6        | 4.6           | 4.6         | 4.6         | 4.6           | -           | -           |
|                                     | $s_9$ MM\$                        | 6.6        | 6.9        | 9.1           | 12.5        | 12.5        | 12.5          | 13.5        | 13.5        |
| $\gamma_{t,e,f,c,s}^{ST}$           | $s_3$ MM\$                        | 2.0        | 2.4        | 3.1           | 11.8        | 11.8        | 9.7           | 7.4         | 5.3         |
|                                     | $s_4$ MM\$                        | 32.6       | 38.7       | 48.7          | 172.7       | 172.7       | 143.9         | 111.6       | 81.2        |
|                                     | $s_6$ MM\$                        | 22.4       | 24.7       | 33.8          | 70.5        | 70.5        | 64.3          | 26.4        | 19.6        |
| $\kappa_{t,e,f,c}^{FX}$             | MM\$/yr                           | 17.0       | 17.0       | 17.0          | 17.0        | 17.0        | 17.0          | 17.0        | 17.0        |
| $\kappa_{t,e,f,c}^M$                | \$/Mg feedstock                   | 9.9        | 9.5        | 6.2           | 1.0         | 1.0         | 1.0           | 0.0         | 0.0         |
| $\kappa_{t,e,f,c}^O$                | \$/Mg feedstock                   | 24.0       | 26.7       | 29.3          | 24.0        | 26.7        | 29.4          | 24.0        | 29.1        |
| $\eta_{t,e,f,c}^F$                  | GGE/Mg feedstock                  | 88.9       | 85.8       | 60.5          | 65.8        | 63.8        | 44.1          | 40.3        | 21.5        |
| $\psi_{t,e,f,c}^{CCS}$              | Mg CO <sub>2</sub> /Mg feedstock  | -          | 0.85       | 1.56          | -           | 0.85        | 1.60          | -           | 1.38        |
| $\psi_{t,e,f,c}^{CHE}$              | Mg CO <sub>2e</sub> /Mg feedstock | 0.009      | 0.009      | 0.009         | 0.009       | 0.009       | 0.009         | 0.009       | 0.009       |
| References                          |                                   | 16,17      | 14,16,17   | 14,16,17      | 16          | 14,16       | 14,16         | 16          | 14,16       |

## S6. Energy Production Forecasts

The assumed electricity and hydrogen production mix, and the average emissions per kWh, for every five years from 2020-2050 are given in Table S6.1 and Table S6.2.

**Table S6.1.** Electricity and hydrogen production mix and emissions for the reference scenario.<sup>18</sup>

| Production Source                    | Units                  | 2020  | 2025  | 2030  | 2035  | 2040  | 2045  | 2050  |
|--------------------------------------|------------------------|-------|-------|-------|-------|-------|-------|-------|
| <b>Annual Electricity Production</b> |                        |       |       |       |       |       |       |       |
| Onshore Wind                         | TWh                    | 411   | 413   | 510   | 613   | 942   | 1177  | 1300  |
| Offshore Wind                        | TWh                    | 0.1   | 3.7   | 11.1  | 23.4  | 28.7  | 38.7  | 173   |
| Rooftop PV                           | TWh                    | 50.1  | 79.5  | 102   | 130   | 174   | 221   | 268   |
| Utility PV                           | TWh                    | 49.1  | 54.5  | 72.9  | 131   | 182   | 199   | 257   |
| Hydro                                | TWh                    | 300   | 312   | 295   | 296   | 304   | 294   | 295   |
| Geothermal                           | TWh                    | 14.6  | 14.5  | 14.6  | 14.6  | 14.2  | 14.2  | 13.9  |
| Nuclear                              | TWh                    | 802   | 775   | 733   | 620   | 558   | 456   | 394   |
| Natural Gas                          | TWh                    | 1547  | 1791  | 2184  | 2446  | 2263  | 2339  | 2245  |
| Natural Gas + CCS                    | TWh                    | 0     | 0     | 0.3   | 0.4   | 0.4   | 0.4   | 0.4   |
| Biomass                              | TWh                    | 16.8  | 20.1  | 14    | 8.9   | 3.8   | 4.4   | 5.6   |
| Biomass + CCS                        | TWh                    | 0     | 0     | 0.1   | 0.1   | 0.1   | 0.1   | 0.1   |
| Coal                                 | TWh                    | 965   | 844   | 534   | 394   | 366   | 342   | 310   |
| Average Emissions                    | gCO <sub>2e</sub> /kWh | 0.600 | 0.538 | 0.486 | 0.465 | 0.416 | 0.402 | 0.366 |
| <b>Annual Hydrogen Production</b>    |                        |       |       |       |       |       |       |       |
| Biomass                              | TWh                    | 0     | 0     | 0     | 0     | 0     | 0     | 0     |
| Fossil                               | TWh                    | 248.9 | 259.7 | 265.3 | 265.3 | 265.0 | 261.4 | 260.6 |
| Electrolysis                         | TWh                    | 0.2   | 0.2   | 0.3   | 0.4   | 0.6   | 1.0   | 1.6   |
| Average Emissions                    | gCO <sub>2e</sub> /kWh | 0.290 | 0.290 | 0.290 | 0.290 | 0.290 | 0.290 | 0.290 |

**Table S6.2.** Electricity and hydrogen production mix and emissions for the high electrification scenario.<sup>19</sup>

| Production Source             | Units                  | 2020  | 2025  | 2030  | 2035  | 2040  | 2045  | 2050  |
|-------------------------------|------------------------|-------|-------|-------|-------|-------|-------|-------|
| Annual Electricity Production |                        |       |       |       |       |       |       |       |
| Onshore Wind                  | TWh                    | 412   | 764   | 1446  | 2119  | 3029  | 3710  | 4485  |
| Offshore Wind                 | TWh                    | 0.093 | 3.9   | 20.3  | 80.7  | 182   | 455   | 934   |
| Rooftop PV                    | TWh                    | 50.1  | 79.4  | 102   | 127   | 168   | 212   | 252   |
| Utility PV                    | TWh                    | 88.9  | 295   | 656   | 1169  | 1694  | 2268  | 2833  |
| Hydro                         | TWh                    | 300   | 312   | 295   | 295   | 302   | 292   | 292   |
| Geothermal                    | TWh                    | 14.5  | 14.5  | 14.3  | 14.2  | 13.8  | 13.7  | 13.1  |
| Nuclear                       | TWh                    | 802   | 775   | 733   | 620   | 558   | 467   | 503   |
| Natural Gas                   | TWh                    | 1490  | 1742  | 1453  | 1117  | 853   | 443   | 202   |
| Natural Gas + CCS             | TWh                    | 0     | 0     | 1.42  | 114   | 152   | 181   | 231   |
| Biomass                       | TWh                    | 18.2  | 19.7  | 39.5  | 26.3  | 18.7  | 13.4  | 0.436 |
| Biomass + CCS                 | TWh                    | 0     | 0     | 21.7  | 21.9  | 53.7  | 76.5  | 79.7  |
| Coal                          | TWh                    | 982   | 284   | 0.599 | 0.598 | 0.526 | 0.429 | 0.152 |
| Average Emissions             | gCO <sub>2e</sub> /kWh | 0.600 | 0.368 | 0.226 | 0.161 | 0.117 | 0.074 | 0.057 |
| Annual Hydrogen Production    |                        |       |       |       |       |       |       |       |
| Biomass                       | TWh                    | 0     | 0     | 0     | 821   | 1529  | 3114  | 4763  |
| Fossil                        | TWh                    | 896   | 953   | 1111  | 785   | 915   | 931   | 560   |
| Electrolysis                  | TWh                    | 0.9   | 0.7   | 0.8   | 1.5   | 17.5  | 406   | 2706  |
| Average Emissions             | gCO <sub>2e</sub> /kWh | 0.290 | 0.289 | 0.289 | 0.289 | 0.287 | 0.230 | 0.108 |

## S7. Biorefinery Carbon Balances

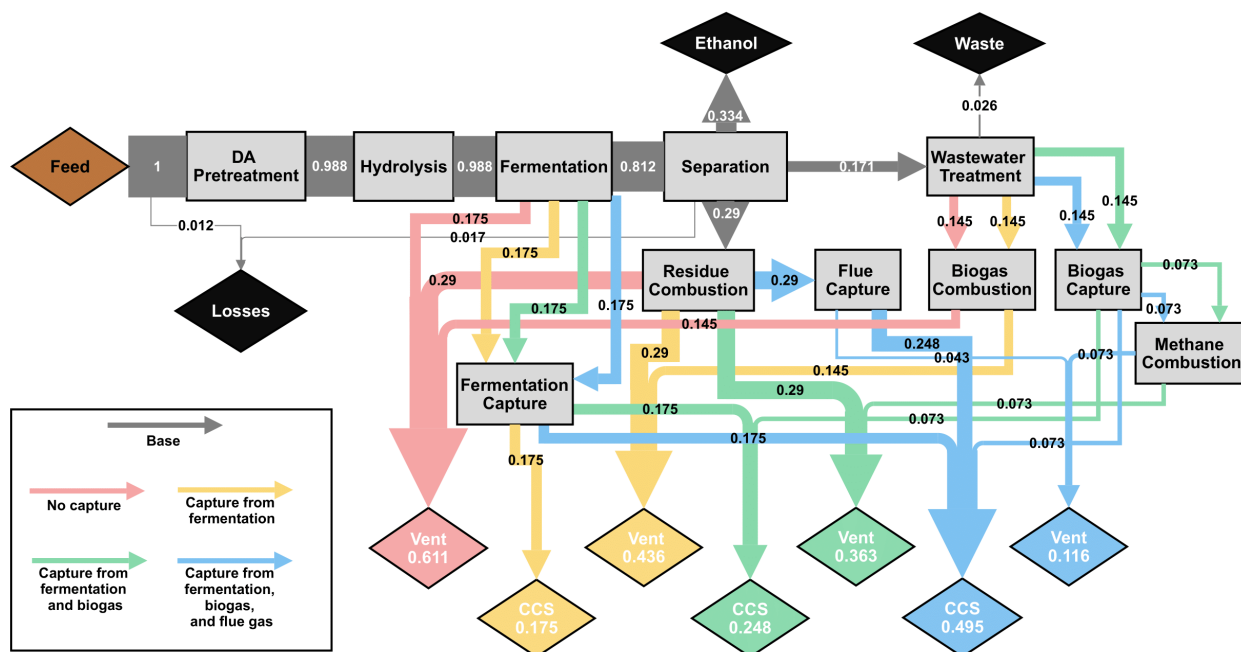

**Figure S7.1.** Carbon molar flows normalized to 1 mole of carbon in the feedstock for a biorefinery producing ethanol via fermentation.

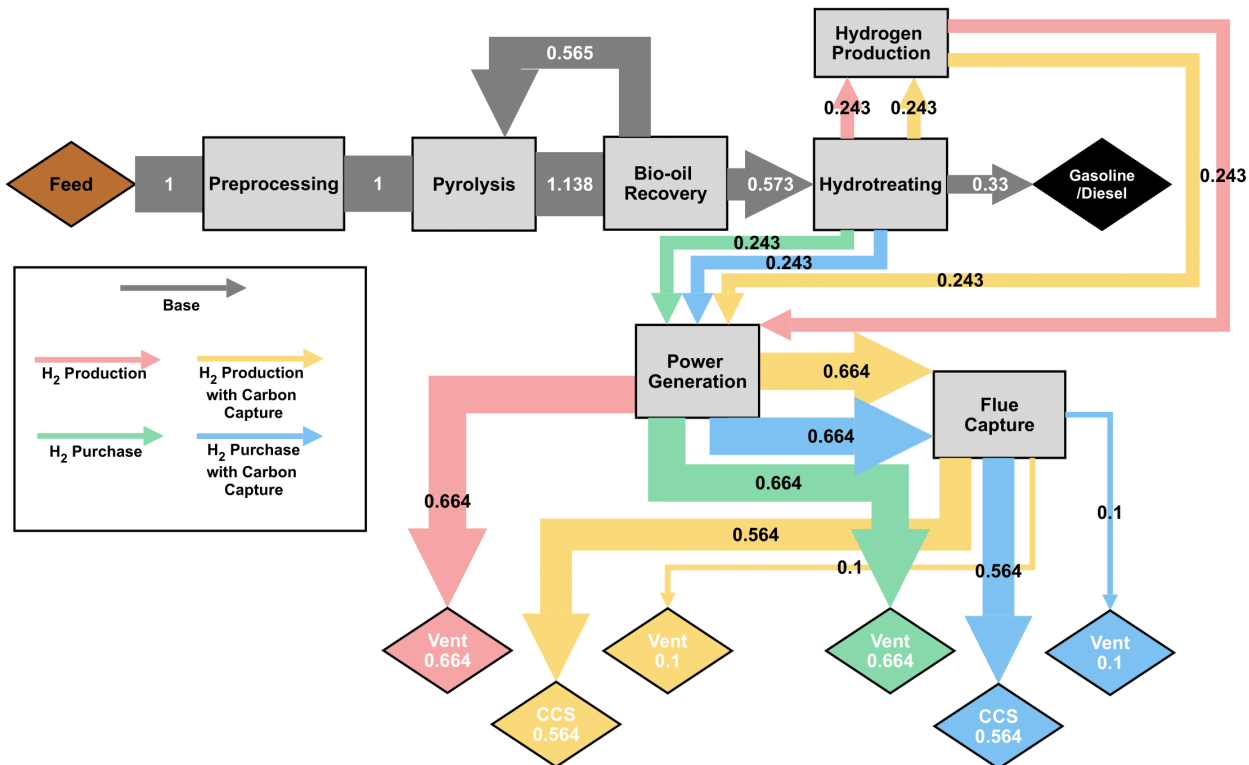

**Figure S7.2.** Carbon molar flows normalized to 1 mole of carbon in the feedstock for a biorefinery producing gasoline/diesel via pyrolysis.

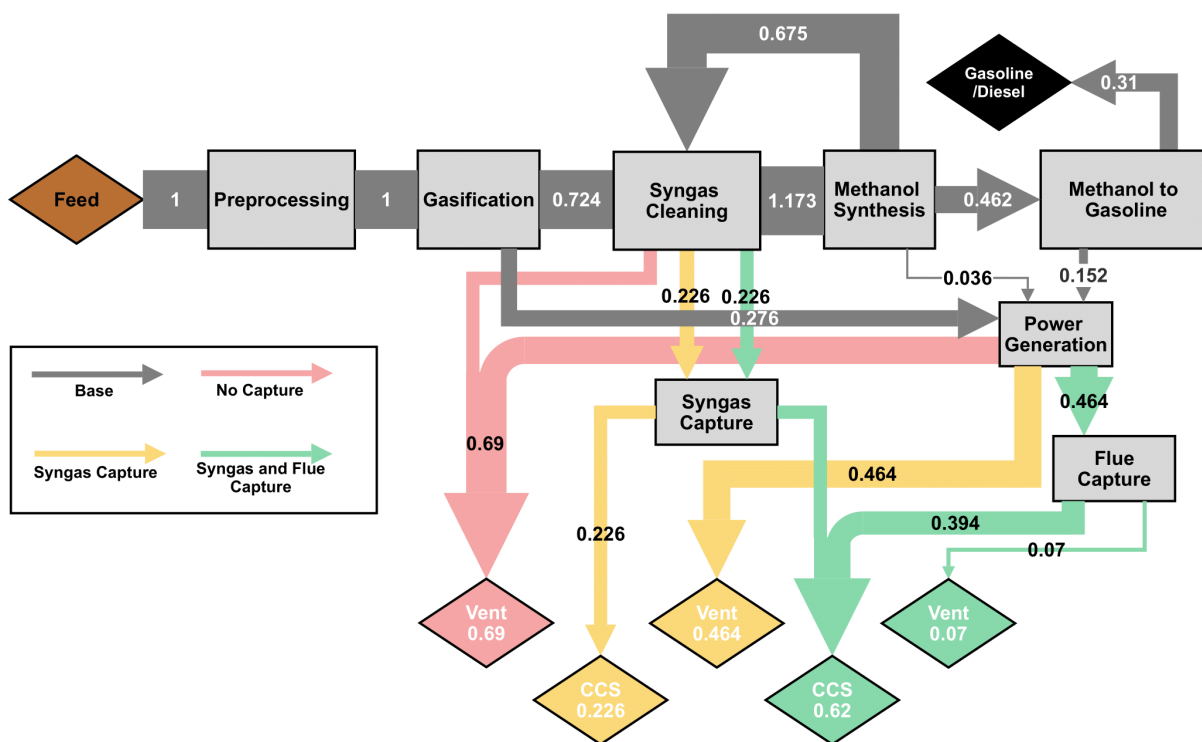

**Figure S7.3.** Carbon molar flows normalized to 1 mole of carbon in the feedstock for a biorefinery producing gasoline via gasification.

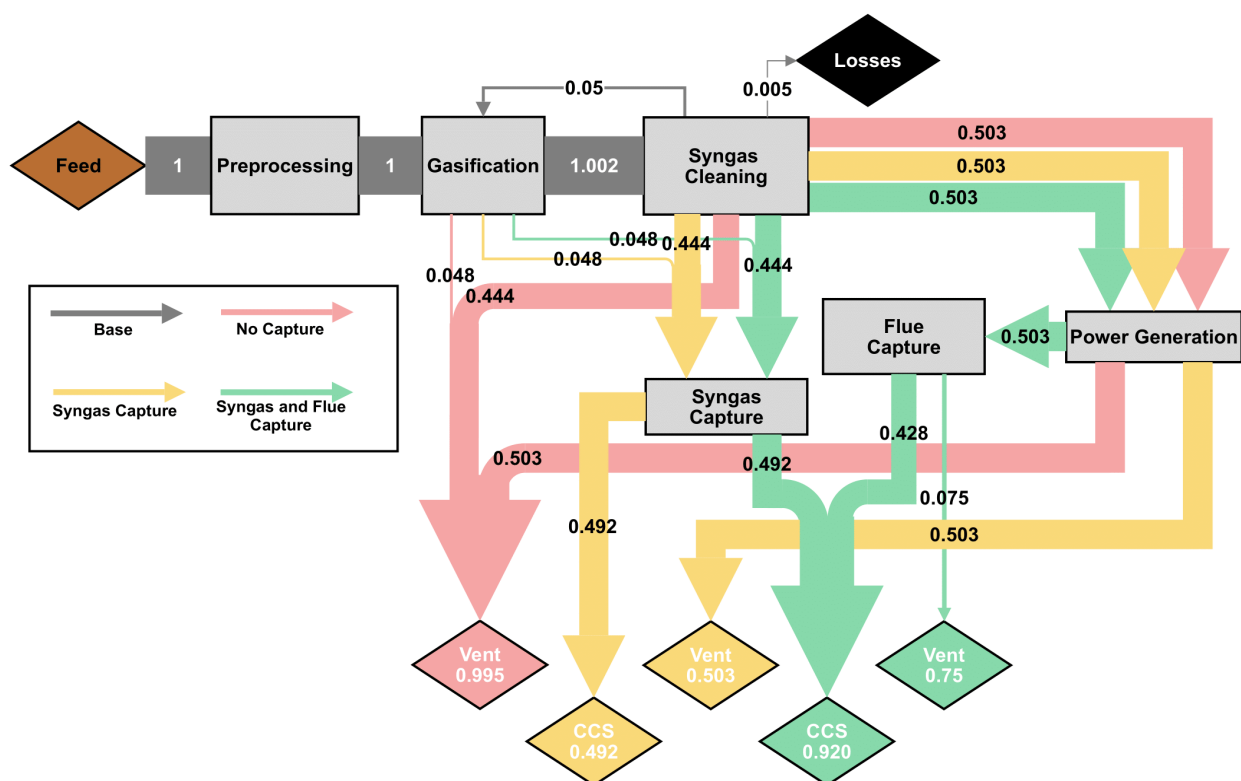

**Figure S7.4.** Carbon molar flows normalized to 1 mole of carbon in the feedstock for a biorefinery producing electricity via gasification and combustion.



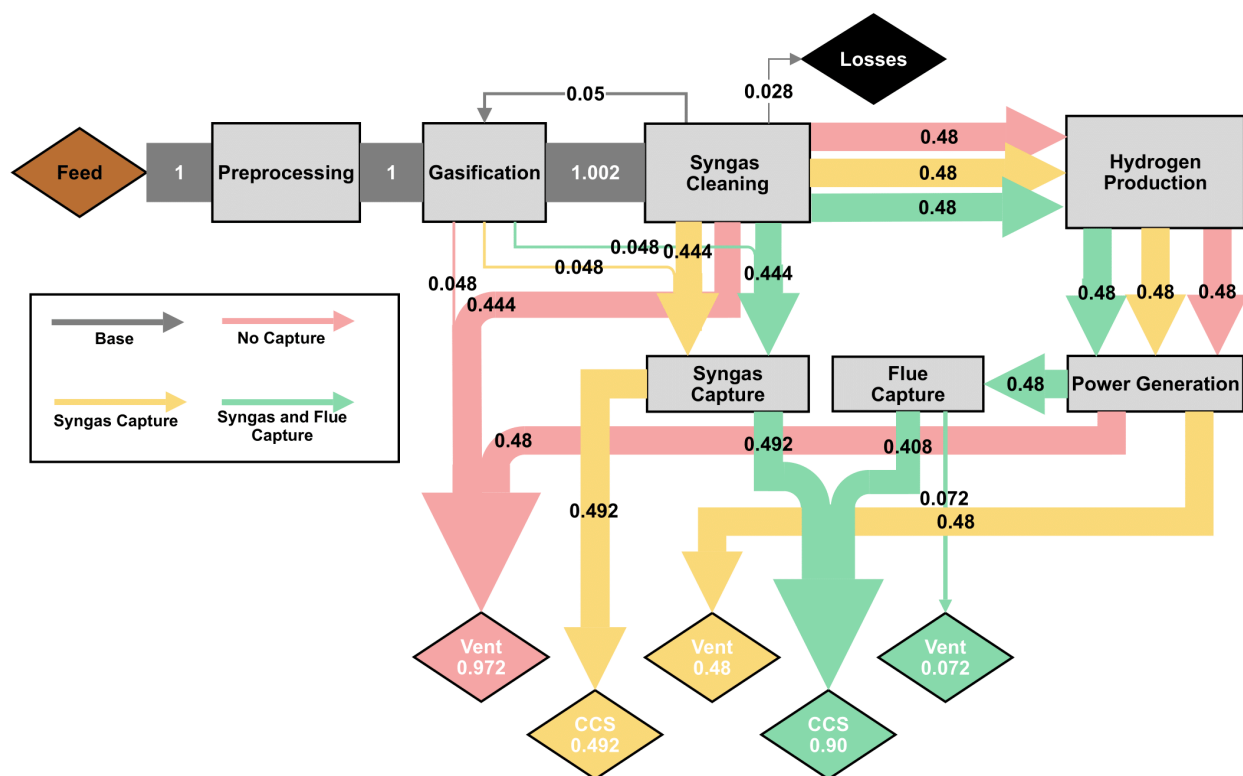

**Figure S7.5.** Carbon molar flows normalized to 1 mole of carbon in the feedstock for a biorefinery producing hydrogen via gasification and water-gas shift.

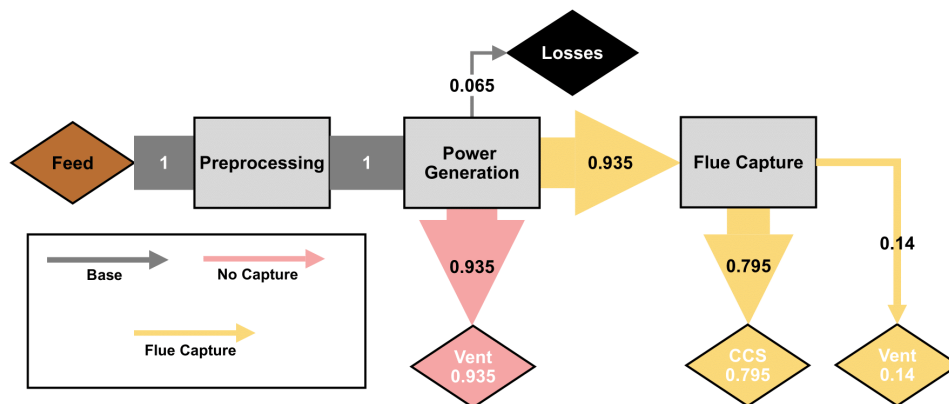

**Figure S7.6.** Carbon molar flows normalized to 1 mole of carbon in the feedstock for a biorefinery producing electricity via direct combustion.

## S8. Carbon Capture Technology

We consider the general effect of separation energy requirement and capital cost, both normalized to the CO<sub>2</sub> flow, on the cost of flue gas capture, as shown in Figure S8.1. Capital costs per CO<sub>2</sub> flow is used to encompass both the relative capital costs of different capture technologies, and the economies of scale of a single capture technology. Similarly, the separation energy encompasses both the relative energy requirements of different capture technologies, and the change in energy requirement based on different CO<sub>2</sub> concentrations in the flue gas. Capture technologies, such as monoethanolamine (MEA) absorption, can include both heat and electricity requirements, so the electricity requirement is converted to the heat required to generate that amount of electricity in a turbogenerator with an efficiency of 75%. We estimate the sequestration credit needed to incentivize capture from flue gas with MEA as \$48-58/Mg CO<sub>2</sub>, depending on the capacity of the biorefinery and on the CO<sub>2</sub> concentration in flue gas. Membrane separation is not as established of a technology as MEA absorption, so we do not report the capital cost.<sup>20</sup>

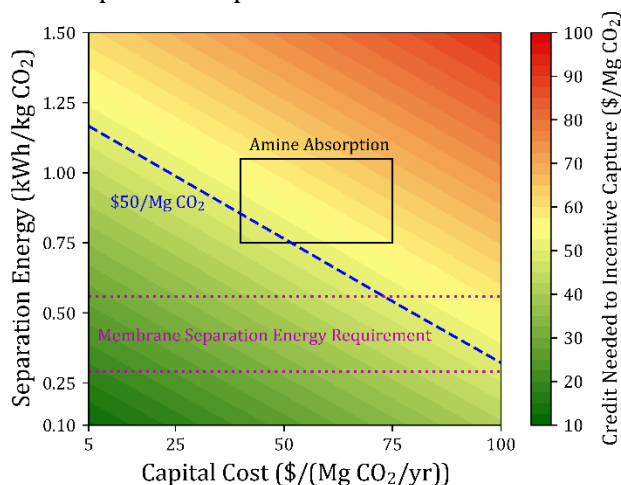

**Figure S8.1.** Sequestration credit needed to incentivize carbon capture from flue gas as a function of separation energy and capital cost. Amine absorption capital costs and energy requirements and membrane energy requirement are taken from literature data.<sup>14,21</sup>

## S9. Impact of Biomass Availability

Biomass availability, both in terms of yield in a single field and in terms of what percent of land is available for crop growth, can vary significantly across the landscape.<sup>22</sup> Therefore, we investigate the effect of biomass availability and biorefinery capacity on fuel cost for Pyr.H2.Liq.– (see Figure S9.1).

As expected, as biomass availability increases, the breakeven cost of fuel decreases because the feedstock is transported over shorter distances, decreasing the average delivered feedstock cost. For a given biomass availability, as the capacity increases, feedstock costs increase while fixed and capital costs per unit of fuel decrease due to economies of scale. At low capacities, increasing capacity has a significant effect on decreasing costs, but the rate of cost savings decreases as the capacity continues to increase. The rate of increase of the feedstock cost depends on transportation method that is economically optimal at a given biomass availability and biorefinery capacity. Direct truck transport has the highest variable transportation cost, followed by depot and truck, then depot and rail.

In the case of low biomass availability, the feedstock cost increases rapidly at low capacities when truck transport is used. However, this rapid increase coincides with the rapid decrease in fixed costs, so increasing capacity is still favorable. As the capacity increases and the rate of increase in feedstock cost slows as depots are used for transportation and the rate of fixed costs savings slow, the breakeven cost continues to slowly decline. At biomass availabilities above 24 Mg/km<sup>2</sup>, the interplay between these two economic forces is different. At low capacities, increasing capacity results in the same fixed cost savings as at lower biomass availabilities, but the average feedstock cost increases more slowly because of the higher biomass availability, making the breakeven cost drop dramatically. At capacities above 17,000 Mg/day, the fixed and capital cost savings from increasing capacity have reduced significantly. However, the feedstock cost still increases relatively quickly as capacity increases. In fact, these feedstock costs increase faster than the fixed and capital costs decrease as capacity increases, causing a minimum in breakeven price. At biomass availabilities above 24 Mg/km<sup>2</sup>, this minimum in breakeven price occurs at capacities where direct truck transport of biomass is preferred, and the cost-optimal capacity increases as the biomass availability increases.

Figure S9.1B shows the optimal capacity as a function of sequestration credit and biomass availability. At low sequestration credits where Pyr.H2.Liq.– is preferred, the optimal capacity depends on biomass availability as shown in Figure S9.1A, but is independent of the sequestration credit applied. At higher credits that incentivize flue gas capture, the optimal capacity does change with sequestration credit even with the same strategy. We use an after-tax refundable tax credit in our model, so at sufficiently high sequestration credits, negative pre-tax income with the sequestration credit can result in no payment of income tax. Increasing the sequestration credit beyond this does not have the added benefit of reducing taxable income, so slightly smaller

biorefineries with lower transportation costs that take full advantage of the sequestration credit offsetting the slightly higher fixed and capital costs is optimal. However, the biorefinery cannot become indefinitely small without the increased fixed and capital costs outweighing the decreases transportation costs, so beyond a sequestration credit of \$60-70 Mg/CO<sub>2</sub>, depending on the biomass availability, the optimal capacity is once again independent of sequestration credit until a new strategy is chosen. This results in a narrow band where the optimal capacity results in exactly no income tax paid. This changing capacity within the same strategy would be different for different tax rates, and may not appear at all for different types of carbon incentives.

With biomass productions of 30-34 Mg/km<sup>2</sup>, Pyr.H2Elec.Liq.Flu uses a biorefinery with the maximum capacity considered of 30,000 Mg/day, while Pyr.H2.Liq.- uses a biorefinery with a smaller capacity. With a lower capacity, Pyr.H2.Liq.- can adjust its capacity to minimize its cost of fuel production, while Pyr.H2Elec.Liq.Flu is limited by the maximum capacity, so a slightly higher sequestration credit is required to incentivize Pyr.H2Elec.Liq.Flu. Once the biomass production increases more, the cost-optimal capacity of Pyr.H2Elec.Liq.Flu decreases to below the maximum and can then adjust its capacity just like Pyr.H2.Liq.-.

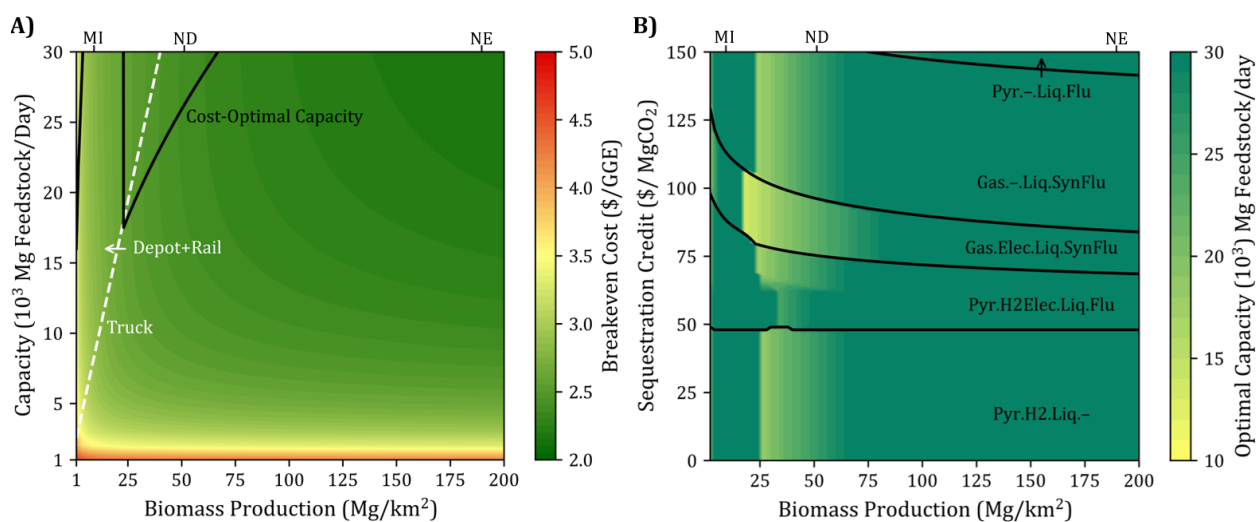

**Figure S9.1.** A) Effect of biomass availability and capacity on breakeven cost for Pyr.H2.Liq.- with no sequestration credit. Dashed white lines indicate capacities at which a new transportation is used for each biomass availability. Black line indicates cost-optimal capacities for a given biomass availability. B) Effect of biomass production and sequestration credit on cost-optimal biorefinery strategy and capacity. Black lines indicate transition to a new biorefinery strategy. For both plots, tick marks and abbreviations above the plot show the average biomass availability of marginal lands for representative US Midwest states (Michigan: 10 Mg/ha, North Dakota: 5.6 Mg/ha, Nebraska: 6.0 Mg/ha), normalized to total land area in the state.<sup>2</sup> (MI: Michigan, ND: North Dakota, NE: Nebraska).

## S10. Future GHG Mitigation of Liquid Fuel Production

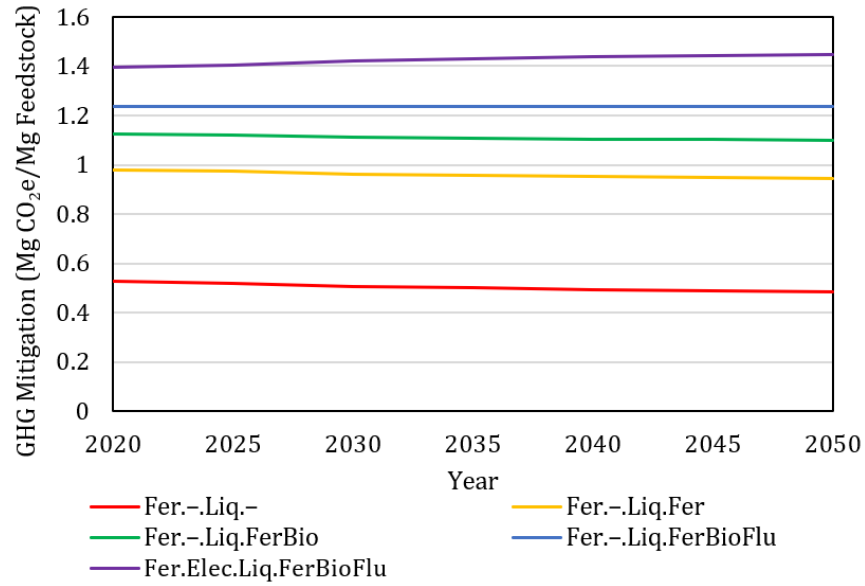

**Figure S10.1.** Expected GHG mitigation over time of biorefinery strategies using fermentation to produce liquid fuels.

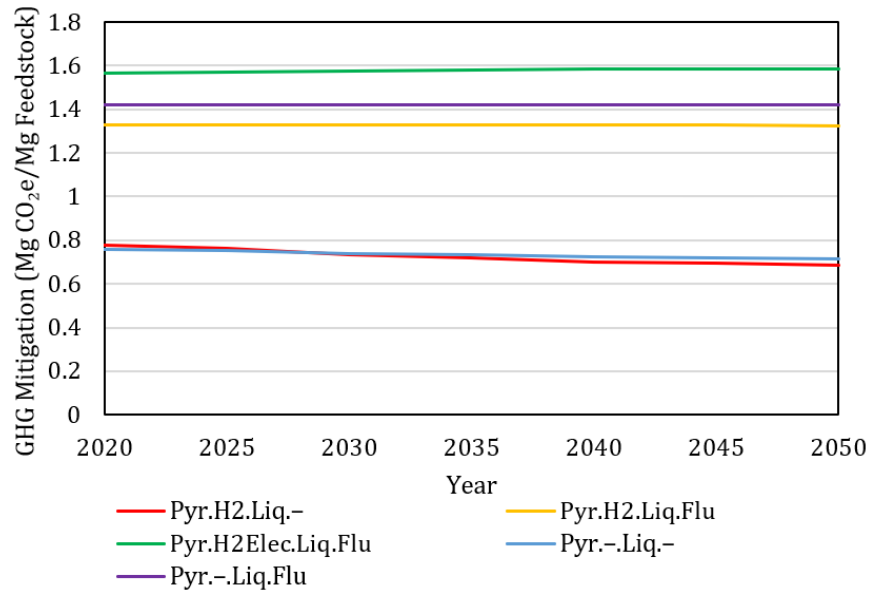

**Figure S10.2.** Expected GHG mitigation over time of biorefinery strategies using pyrolysis to produce liquid fuels.

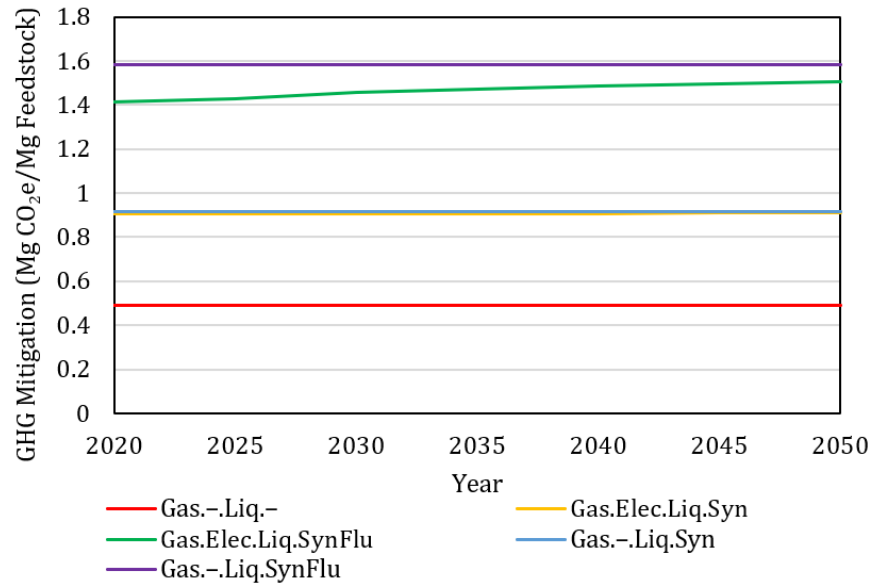

**Figure S10.3.** Expected GHG mitigation over time of biorefinery strategies using gasification to produce liquid fuels.

### S11. Energetic Self-Sufficiency Mitigation

For strategy Gas.-.Liq.SynFlu, the total GHG mitigation is 1.710 Mg CO<sub>2</sub>e/Mg feedstock. If 0.392 MWh/Mg feedstock of renewable electricity were purchased, the corresponding strategy would be Gas.Elec.SynFlu. but with no emission penalty for electricity purchase, which would have a total GHG mitigation of 1.774.

However, that 0.392 MWh/Mg feedstock of renewable electricity is consumed at the biorefinery for strategy Gas.Elec.Liq.SynFlu, but not for strategy Gas.-.Liq.SynFlu. Therefore, we need to consider the mitigation that could be achieved by directly using that electricity for transportation, displacing additional fossil gasoline. With assumed efficiencies of 0.8 for an electric motor, and 0.3 for an internal combustion engine, 0.392 MWh of electricity would displace  $0.392 \left( \frac{0.8}{0.3} \right) = 1.045$  MWh of gasoline. With assumed emissions for gasoline of 10.8 kg CO<sub>2</sub>e/gallon of gasoline, the emissions displaced are:

$$1.045 \text{ MWh gasoline} \left( \frac{1 \text{ gallon gasoline}}{0.0337 \text{ MWh}} \right) \left( \frac{0.0108 \text{ Mg CO}_2\text{e}}{\text{gallon gasoline}} \right) = 0.335 \text{ Mg CO}_2\text{e}$$

So, including the benefit of the 0.392 MWh of renewable electricity displacing fossil gasoline, it is more environmentally beneficial to maintain an energetically self-sufficient biorefinery, and use renewable electricity directly for transportation. The GHG mitigation breakdown for these two strategies is shown in Table S11.1.

**Table S11.1.** GHG mitigation breakdown.

|                                       | GHG Source                  | GHG Mitigation<br>(Mg CO <sub>2</sub> e/Mg feedstock) |                  |
|---------------------------------------|-----------------------------|-------------------------------------------------------|------------------|
|                                       |                             | Gas.Elec.Liq.SynFlu                                   | Gas.-.Liq.SynFlu |
| Biorefinery                           | Harvesting                  | -0.029                                                | -0.029           |
|                                       | Transport                   | -0.080                                                | -0.080           |
|                                       | SOC Sequestration           | 0.125                                                 | 0.125            |
|                                       | CCS                         | 1.157                                                 | 1.263            |
|                                       | Chemicals                   | -0.008                                                | -0.008           |
|                                       | Electricity Credit          | 0                                                     | 0                |
|                                       | Gasoline Credit             | 0.609                                                 | 0.439            |
|                                       | <b>Total at Biorefinery</b> | <b>1.774</b>                                          | <b>1.710</b>     |
| Renewable Electricity                 | Displaced Fossil Gasoline   | 0                                                     | 0.335            |
| Biorefinery and Renewable Electricity | <b>Total GHG Mitigation</b> | <b>1.774</b>                                          | <b>2.045</b>     |

## Supplemental References

- 1 I. Gelfand, S. K. Hamilton, A. N. Kravchenko, R. D. Jackson, K. D. Thelen and G. P. Robertson, *Environ. Sci. Technol.*, 2020, **54**, 2961–2974.
- 2 I. Gelfand, R. Sahajpal, X. Zhang, R. C. Izaurralde, K. L. Gross and G. P. Robertson, *Nature*, 2013, **493**, 514–517.
- 3 S. Kim, X. Zhang, A. D. Reddy, B. E. Dale, K. D. Thelen, C. D. Jones, R. C. Izaurralde, T. M. Runge and C. T. Maravelias, *Environ. Sci. Technol.*, , DOI:10.1021/acs.est.0c01097.
- 4 E. Baik, D. L. Sanchez, P. A. Turner, K. J. Mach, C. B. Field and S. M. Benson, *Proc. Natl. Acad. Sci. U. S. A.*, 2018, **115**, 3290–3295.
- 5 R. T. L. Ng and C. T. Maravelias, *Appl. Energy*, 2017, **205**, 1571–1582.
- 6 D. Humbird, R. Davis, L. Tao, C. Kinchin, D. D. Hsu, A. Aden, P. Schoen, J. Lukas, B. Olthof, M. Worley, D. Sexton and D. Dudgeon, *NREL/TP-5100-47764*, , DOI:10.2172/1013269.
- 7 E. W. Merrow, K. E. Phillips and C. W. Myers, *Understanding Cost Growth and Performance Shortfalls in Pioneer Process Plants*, Rand Corporation, 1981.
- 8 R. Davis, L. Tao, C. Scarlata, E. C. Tan, J. Ross, J. Lukas and D. Sexton, *Process Design and Economics for the Conversion of Lignocellulosic Biomass to Hydrocarbons: Dilute-Acid and Enzymatic Deconstruction of Biomass to Sugars and Catalytic Conversion of Sugars to Hydrocarbons*, 2015.
- 9 F. K. Kazi, J. Fortman and R. P. Anex, *NREL/TP-6A2-46588*.
- 10 A. Dutta, A. H. Sahir, E. C. Tan, D. Humbird, L. J. Snowden-Swan, P. Meyer, J. Ross, D. Sexton, R. Yap and J. Lukas, *NREL/TP-5100-62455*.
- 11 A. Dutta, C. Mukarakate, K. Iisa, H. Wang, M. Talmadge, D. Santosa, K. Harris, F. Baddour, D. Hartley, H. Cai, L. Ou, J. Schaidle and M. Griffin, *NREL/TP-5100-80291*.
- 12 E. C. Tan, M. Talmadge, A. Dutta, J. Hensley, J. Schaidle, M. Bidy, D. Humbird, L. J. Snowden-Swan, J. Ross, D. Sexton, R. Yap and J. Lukas, *NREL/TP-5100-62402*.
- 13 K. Harris, D. Ruddy, C. Nash, A. Dutta, D. Dupuis, E. Tan, D. Hartley and H. Cai, *NREL/TP-5100-79986*.
- 14 J. Kim, T. A. Johnson, J. E. Miller, E. B. Stechel and C. T. Maravelias, *Energy Environ. Sci.*, 2012, **5**, 8417–8429.
- 15 J. Kim, C. A. Henao, T. A. Johnson, D. E. Dedrick, J. E. Miller, E. B. Stechel and C. T. Maravelias, *Energy Environ. Sci.*, 2011, **4**, 3122–3132.
- 16 R. M. Swanson, A. Platon, J. A. Satrio and R. C. Brown, *NREL/TP-6A20-46587*.
- 17 P. Spath, A. Aden, T. Eggeman, M. Ringer, B. Wallace and J. Jechura, *NREL/TP-510-37408*.
- 18 U.S. Energy Information Administration, *Annual Energy Outlook 2020*, 2020.
- 19 E. D. Larson, C. Greig, J. Jenkins, E. Mayfield, A. Pascale, C. Zhang, J. Drossman, R. Williams, S. Pacala, R. Socolow, E. Baik, R. Birdsey, R. Duke, R. Jones, B. Haley, E. Leslie, K. Paustian and A. Swan, *Net-Zero America: Potential Pathways, Infrastructure, and Impacts Interim Report*, Princeton, NJ, 2020.



- 20 A. Kiani, K. Jiang and P. Feron, *Front. Energy Res.*, 2020, **8**, 1–13.
- 21 H. Zhai and E. S. Rubin, *Environ. Sci. Technol.*, 2013, **47**, 3006–3014.
- 22 R. T. L. Ng, D. Kurniawan, H. Wang, B. Mariska, W. Wu and C. T. Maravelias, *Appl. Energy*, 2018, **216**, 116–131.
